# Supplementary material
Source: Springer Nature journal article supplement (https://www.springermedizin.de/resource/supplementary/12913_2012_2969_MOESM1_ESM.pdf/9532450)
Supplement: MOESM1 [file 9532450]

Phase 1 sample 2006 (N = 5000)

2159 non respondents

Phase 1 data 2006 (N = 2841)

635 gave no consent to participate  
future studies

Gave consent to participate future  
studies (N = 2206)

37 had missing address or had died

Phase 2 sample 2010 (N = 2169)

464 non respondents

Phase 2 data (N = 1705)

190 had incomplete data at phase 1 or  
at phase 2

Present study population (N = 1515)
